# Supplementary material for: In Vitro Evaluation of the Neuroprotective Effect of Panax notoginseng Saponins by Activating the EGFR/PI3K/AKT Pathway
Source: Hindawi journal article supplement (doi:10.1155/2020/1403572), 2020-01-01
Supplement: f1 [file 1403572.f1.pdf]

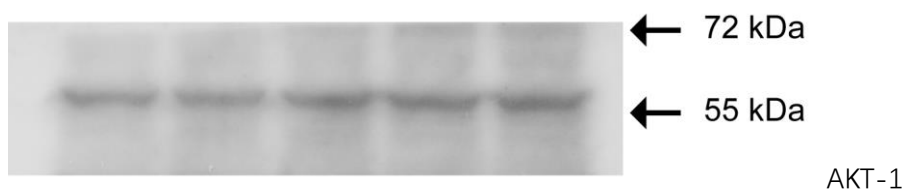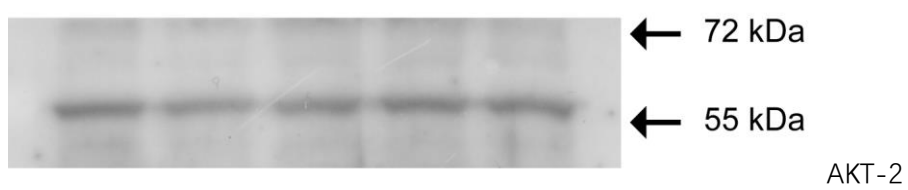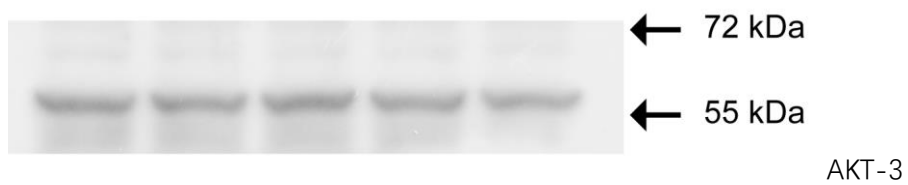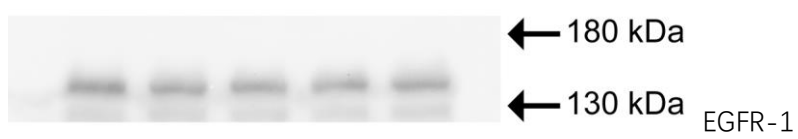

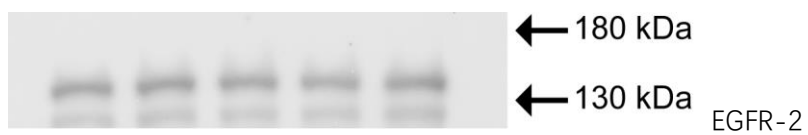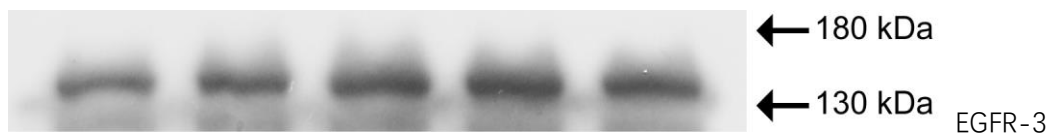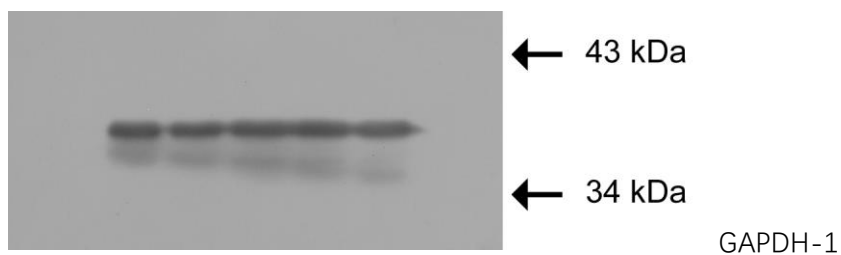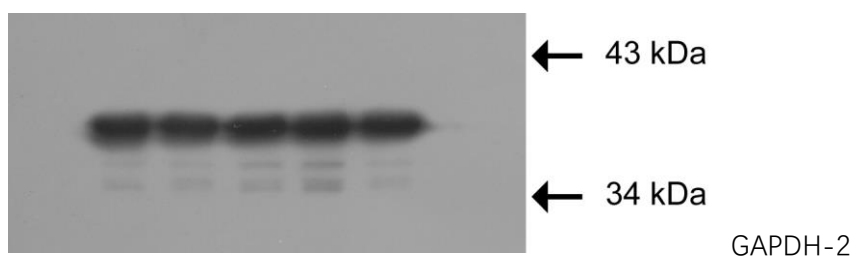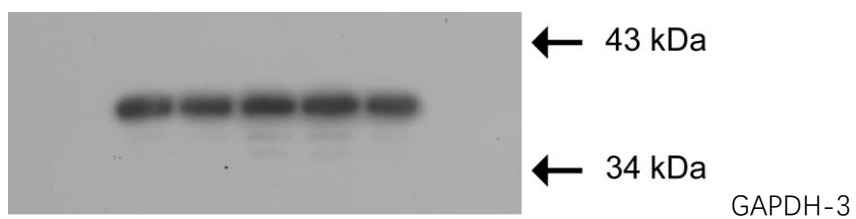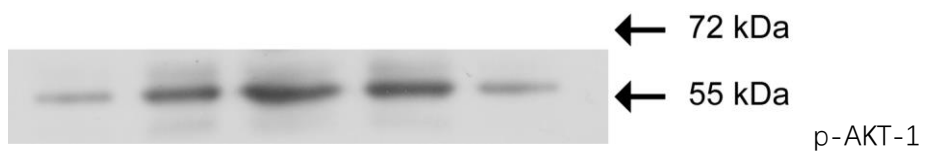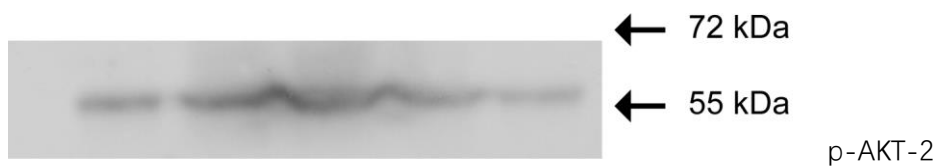

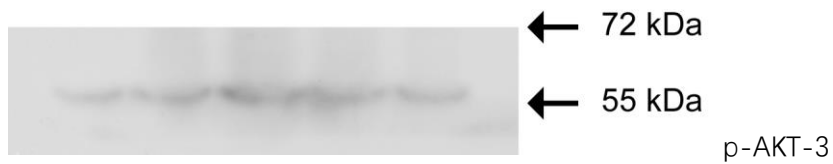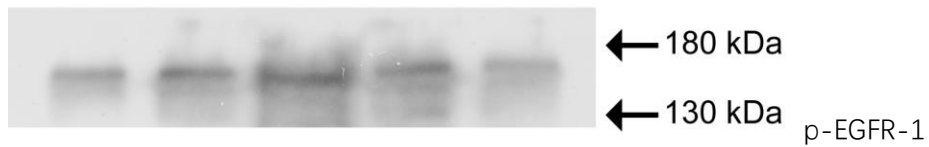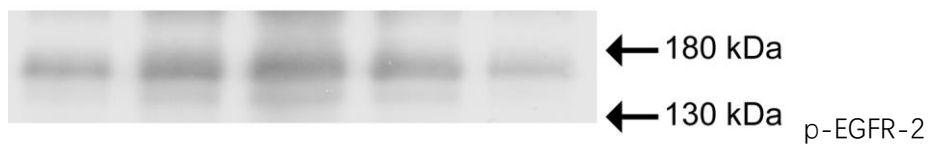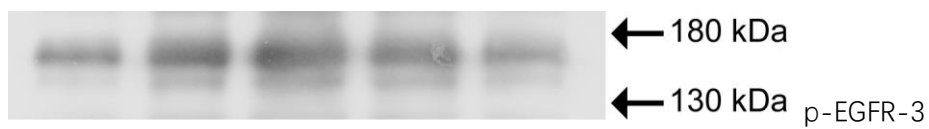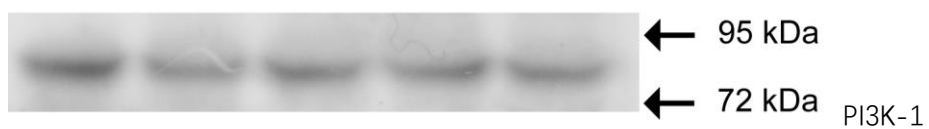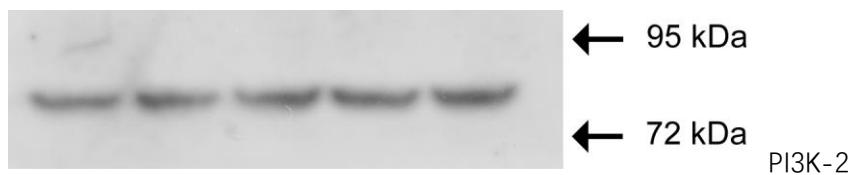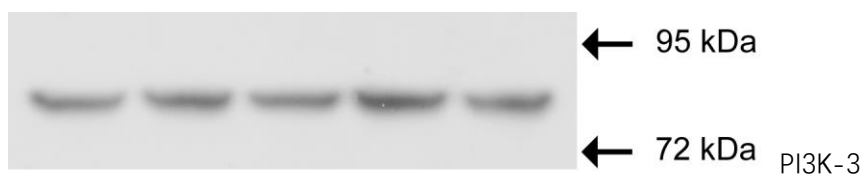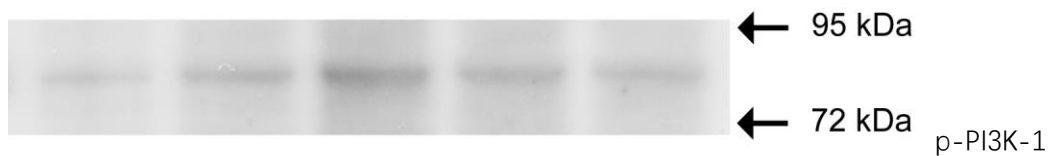

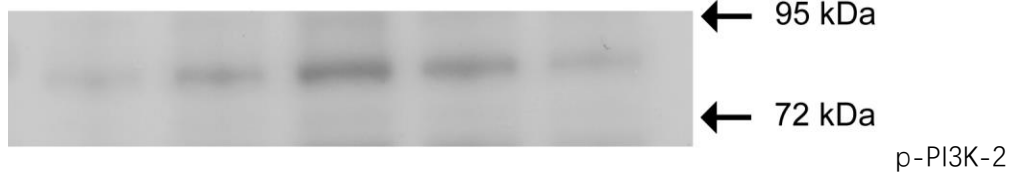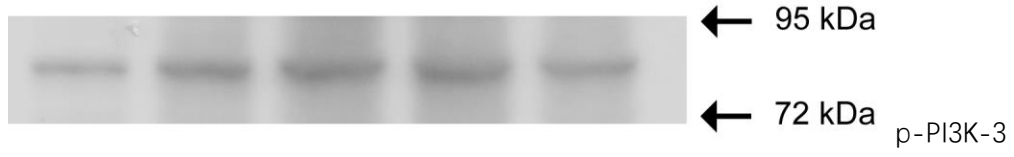

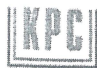

## 检验报告

检品名称: 注射用血塞通(冻干)  
检品批号: 16BB205  
规格: 200mg\*10支/盒\*54盒/箱  
产品数量: 162件48盒(87960支)

生产日期: 2016-02-02  
有效期至: 2019-01  
报告日期: 2016-02-18  
检验依据: 按照WS-10986(ZD-0986)-2002-2011Z和《中国药典》2015版标准

| 检验项目                       | 标准规定                                                       | 检验结果                                            |
|----------------------------|------------------------------------------------------------|-------------------------------------------------|
| 【性状】                       | 本品为类白色至淡黄色无定形粉末或疏松固体状物; 味苦、微甘; 有引湿性                        | 本品为类白色疏松固体状物; 味苦、微甘; 有引湿性                       |
| 【鉴别】液相色谱                   | 应呈现于三七总皂苷对照提取物中R1、Rg1、Re、Rb1、Rd色谱峰保留时间相同的色谱峰               | 符合规定                                            |
| 【检查】不溶性微粒                  | 每个供试品容器中: 含10um及10um以上微粒不得过6000粒, 含25um及25um以上微粒不得过600粒    | 每个供试品容器中: 含10um及10um以上微粒373粒, 含25um及25um以上微粒13粒 |
| pH值                        | 5.0~7.0                                                    | 5.9                                             |
| 溶液的颜色                      | 溶液应澄清; 与4号黄色标准比色液比较, 不得更深                                  | 溶液澄清; 浅于2号黄色标准比色液                               |
| 干燥失重                       | ≤5.0%                                                      | 0.38%                                           |
| 蛋白质                        | 应符合规定                                                      | 符合规定                                            |
| 鞣质                         | 应符合规定                                                      | 符合规定                                            |
| 树脂                         | 应符合规定                                                      | 符合规定                                            |
| 草酸盐                        | 应符合规定                                                      | 符合规定                                            |
| 钾离子                        | 应符合规定                                                      | 符合规定                                            |
| 炽灼残渣                       | ≤0.5%                                                      | 0.05%                                           |
| 异常毒性                       | 应符合规定                                                      | 符合规定                                            |
| 热原                         | 应符合规定                                                      | 符合规定                                            |
| 无菌                         | 阳性管在48~72小时内应长菌, 其余管培养14天不得长菌                              | 符合规定                                            |
| 溶血与凝聚                      | 应符合规定                                                      | 符合规定                                            |
| 装量差异                       | ±7%                                                        | ±7%                                             |
| 可见异物                       | 应符合规定                                                      | 符合规定                                            |
| 指纹图谱                       | 应符合规定                                                      | 符合规定                                            |
| 重金属及有害元素残留                 | 应符合规定                                                      | 符合规定                                            |
| 【含量】(标示量计)三七皂苷R1           | 6.0%~16.0%                                                 | 9.8%                                            |
| 【含量】(标示量计)人参皂苷Rg1          | 28.0%~50.0%                                                | 38.4%                                           |
| 【含量】(标示量计)人参皂苷Re           | 2.5%~7.0%                                                  | 5.4%                                            |
| 【含量】(标示量计)人参皂苷Rb1          | 26.0%~40.0%                                                | 34.8%                                           |
| 【含量】(标示量计)人参皂苷Rd           | 3.5%~12.0%                                                 | 4.7%                                            |
| 【含量】(标示量计)R1+Rg1+Rb1+Re+Rd | 80.0%~115.0%                                               | 93.0%                                           |
| 结论:                        | 本品按照WS-10986(ZD-0986)-2002-2011Z和《中国药典》2015版标准检测, 结果: 符合规定 |                                                 |

合格品

|                            |                         |
|----------------------------|-------------------------|
| 检验者: 丁文纯, 耿礼景, 任颖达, 申鸿, 王敏 | 复核者: 罗兴芳, 唐一凡, 张珍妮, 朱菊仙 |
| 审核意见: 符合规定                 | 检验监督QA: 胡丽娜 2016.02.24  |
| 审核意见: 符合要求                 | 生产监督QA: 王明亮 2016.02.25  |
| 放行责任人: 胡云 2016.02.25       |                         |
